# Supplementary material for: F-doped zinc ferrite as high-performance anode materials for lithium-ion batteries
Source: Royal Society of Chemistry journal article supplement (doi:10.1039/d2nj01172g), 2022-01-01
Supplement: d2nj01172g1.pdf [file d2nj01172g1.pdf]

## Supplementary Information

### **F-doped zinc ferrite as high-performance anode materials for lithium-ion battery**

Qiong Zhao,<sup>a</sup> Puguang Peng,<sup>a</sup> Piao Zhu, <sup>a</sup>Gang Yang, <sup>a</sup>Rui Ding,<sup>a</sup> Ping Gao,<sup>a</sup> Xiujuan Sun,<sup>\*a</sup> and Enhui Liu <sup>\*a</sup>

<sup>a</sup>Key Laboratory of Environmentally Friendly Chemistry and Applications of Ministry of Education, College of Chemistry, Xiangtan University, Hunan 411105, P. R. China

\*Corresponding authors E-mail: sunxj594@xtu.edu.cn; liuenhui99@sina.com

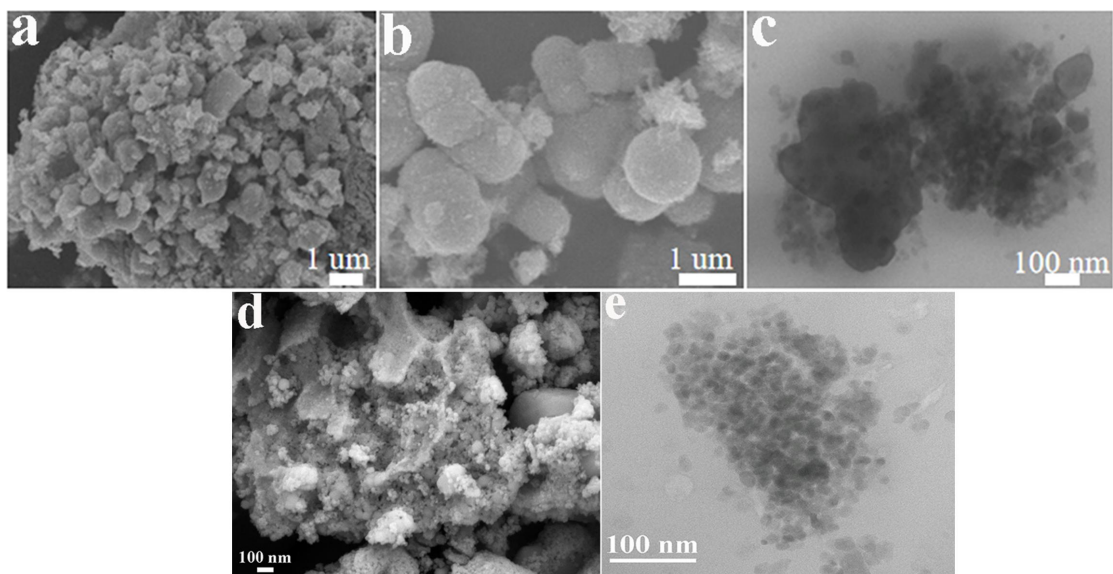

**Fig. S1. (a-b) SEM images of ZFO; and (c)TEM image of ZFO;SEM and TEM images of ZFO-F<sub>3</sub>**

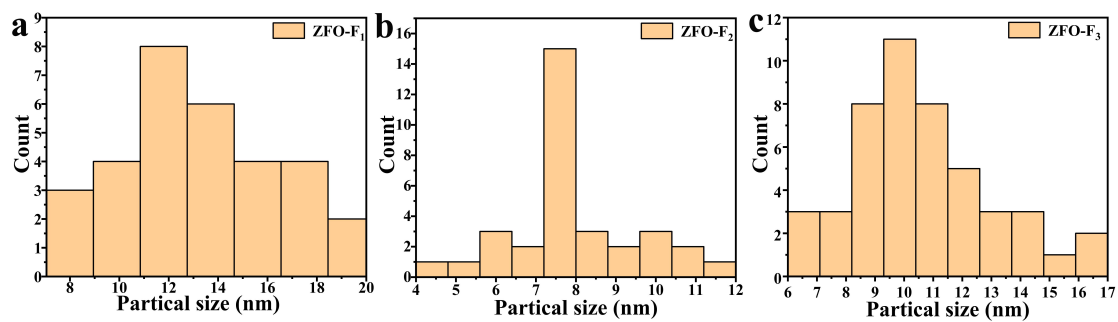

**Fig. S2.** The particle size distribution of ZFO-F<sub>1</sub> (a), ZFO-F<sub>2</sub> (b), ZFO-F<sub>3</sub> (c) calculated from SEM images.

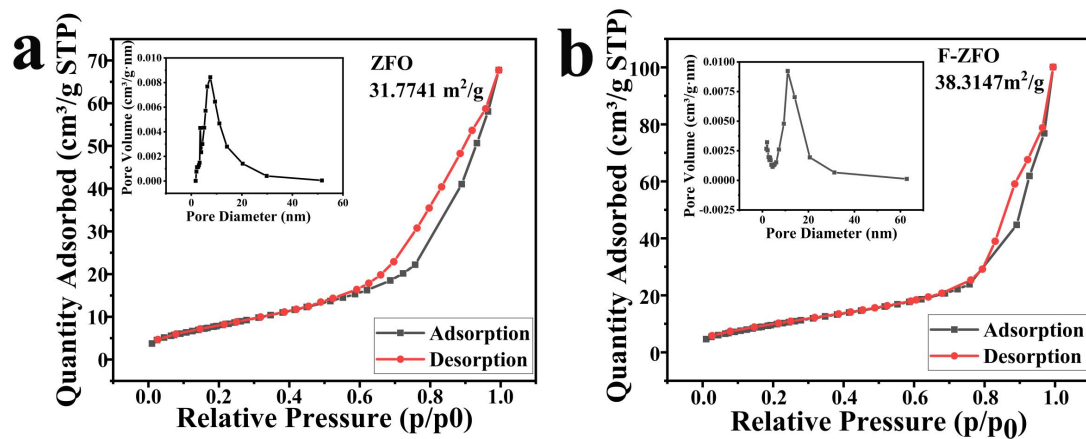

Fig. S3. N<sub>2</sub> adsorption-desorption isotherms and the corresponding pore size analysis. (a) ZFO and (b) ZFO-F<sub>2</sub>.

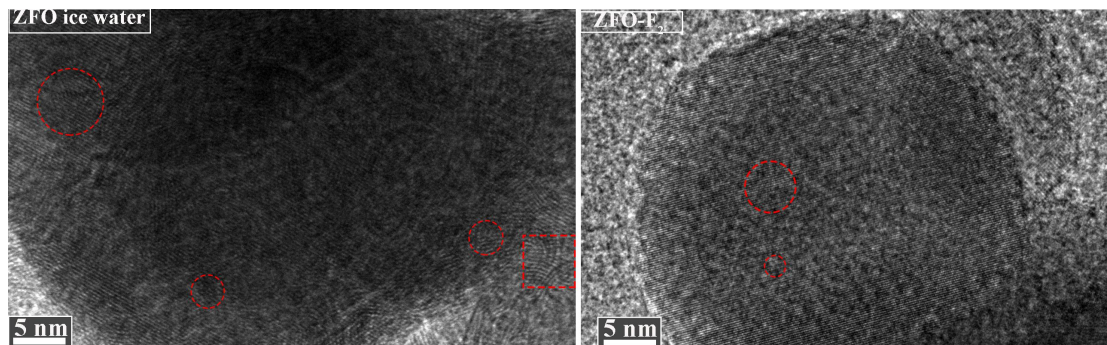

**Fig. S4. HRTEM diagram of zinc ferrate quenched in ice water and fluorine salt solution respectively**

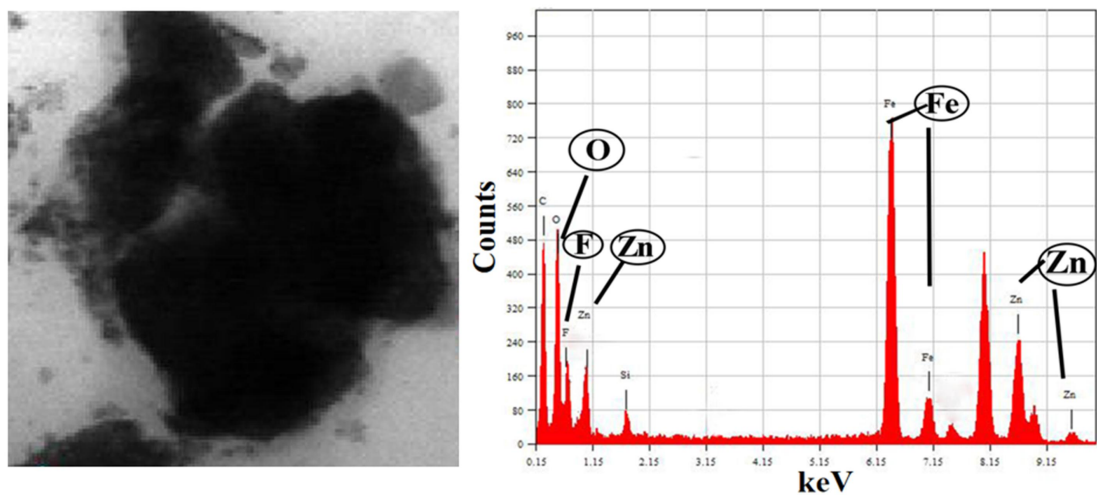

Fig. S5. The energy dispersive X-ray spectroscopy (EDX) of ZFO-F<sub>2</sub>.

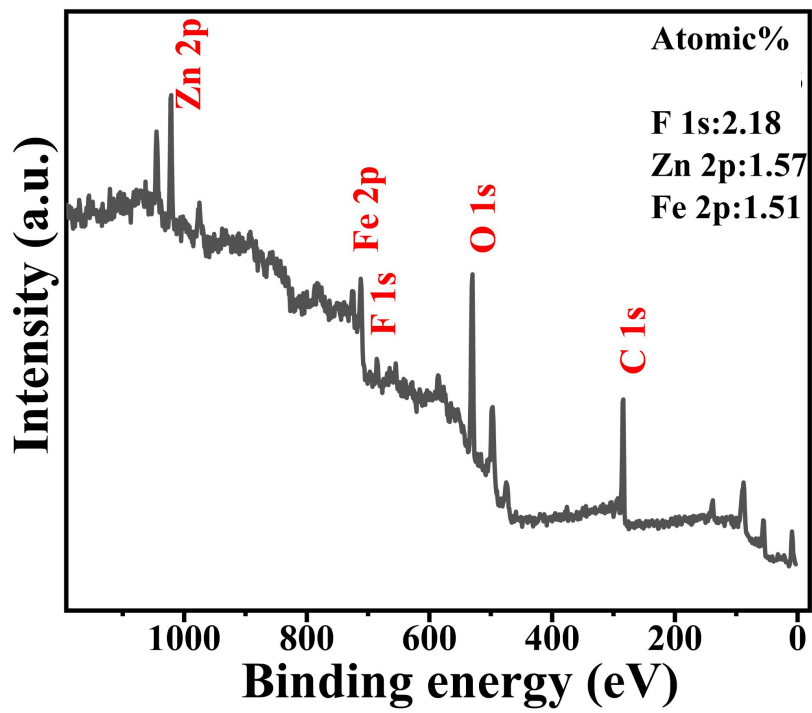

Fig. S6. Full XPS spectrum of ZFO-F<sub>2</sub>.

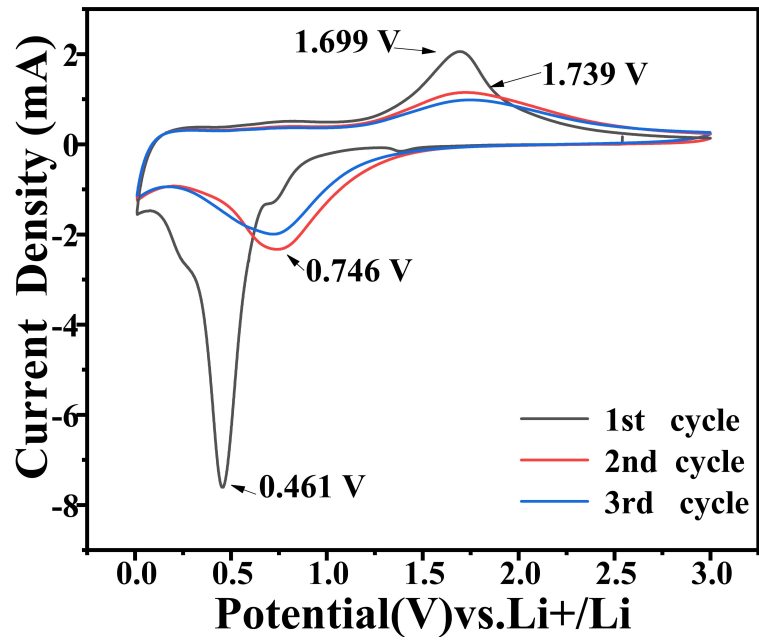

Fig. S7. CV results of the first three cycles of ZFO.



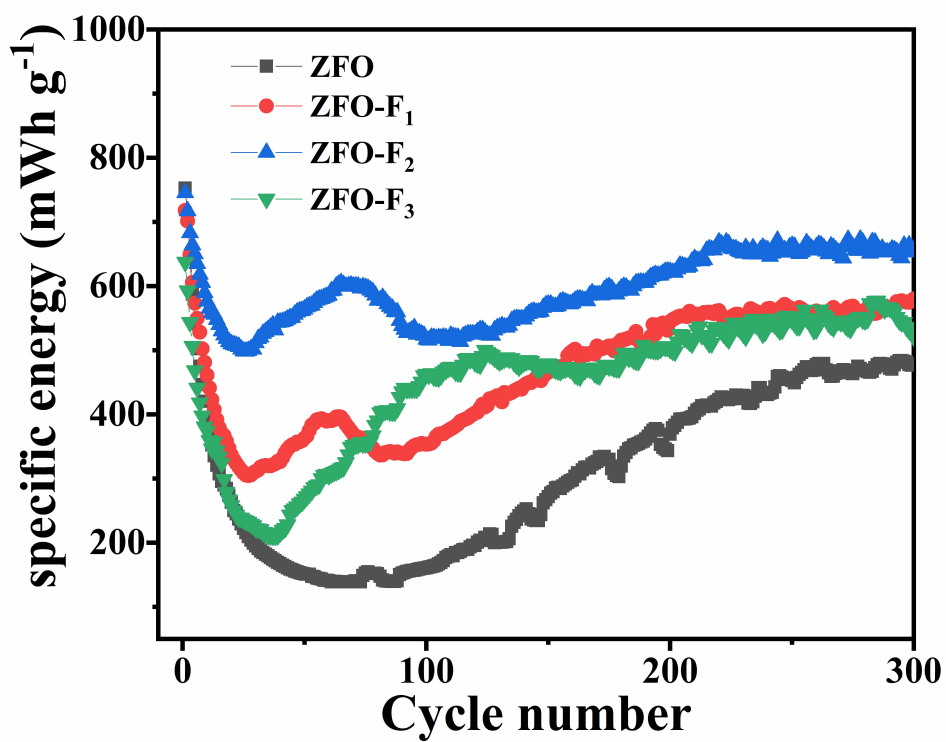

Fig. S8. Specific energy of ZFO, ZFO-F<sub>1</sub>, ZFO-F<sub>2</sub>, ZFO-F<sub>3</sub>.

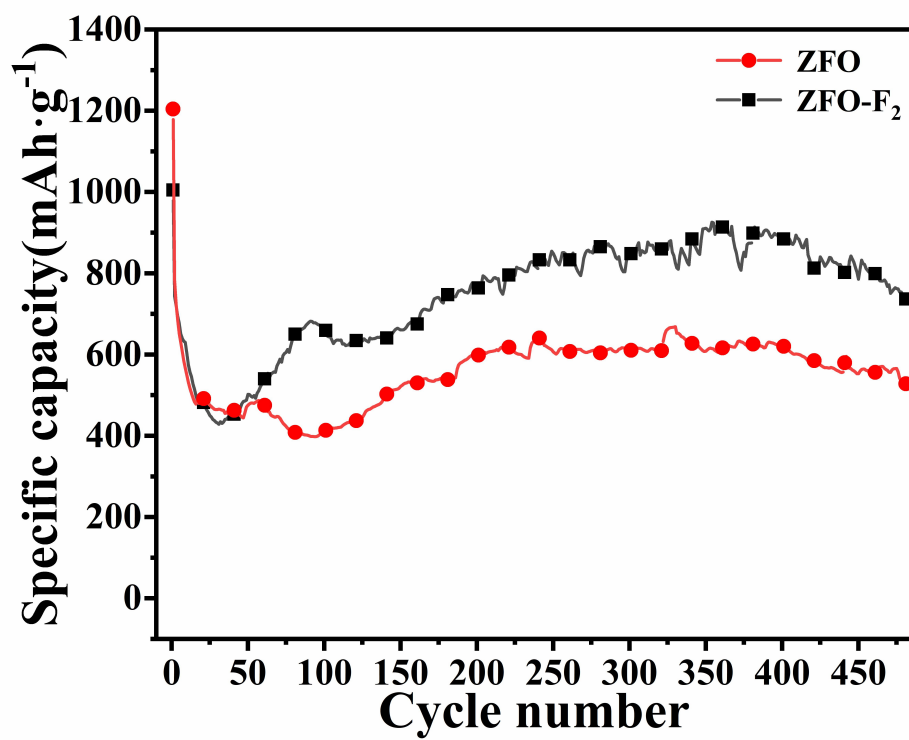

Fig. S9. Cycle life diagram of ZFO and ZFO-F<sub>2</sub> for 500 cycles

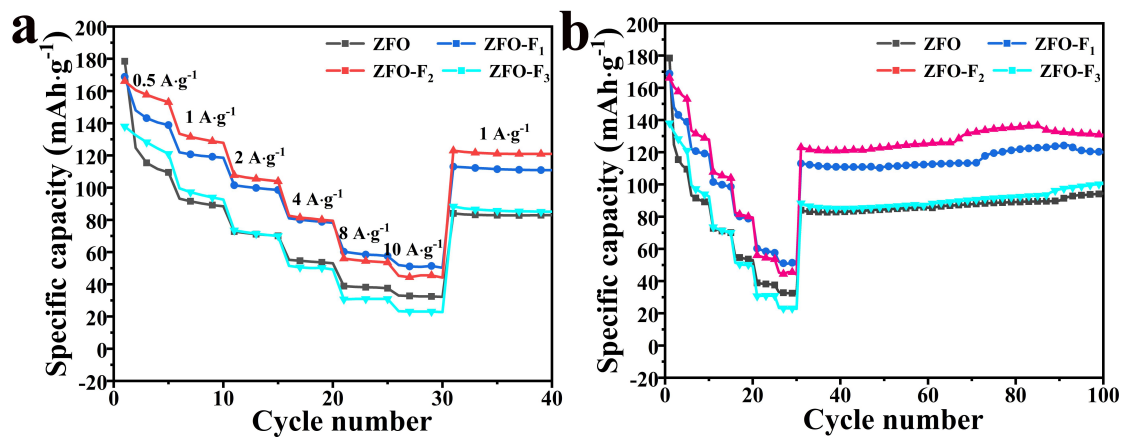

Fig. S10. Rate performance and cycle life diagrams for ZFO, ZFO-F<sub>1</sub>, ZFO-F<sub>2</sub>, ZFO-F<sub>3</sub> materials assembled into full cells(a,b)

**Table S1. The (220) crystalline surface crystal spacing of ZFO, ZFO-F<sub>1</sub>, ZFO-F<sub>2</sub>, ZFO-F<sub>3</sub>.**

| Materials          | Lattice spacing (220) |
|--------------------|-----------------------|
| ZFO                | 0.301 nm              |
| ZFO-F <sub>1</sub> | 0.2985 nm             |
| ZFO-F <sub>2</sub> | 0.2980 nm             |
| ZFO-F <sub>3</sub> | 0.2982 nm             |

**Table S2. The contents of various O formats in ZFO and ZFO-F (obtained by O 1s XPS spectra)**

| O1s                | M-O bond (%) | Oxygen vacancy (%) | Oxygen absorption (%) |
|--------------------|--------------|--------------------|-----------------------|
| ZFO                | 50.22        | 47.77              | 2.01                  |
| ZFO-F <sub>1</sub> | 38.68        | 57.43              | 3.89                  |
| ZFO-F <sub>2</sub> | 26.12        | 68.73              | 5.15                  |
| ZFO-F <sub>3</sub> | 12.20        | 78.83              | 8.97                  |

**Table S3. The corresponding  $R_s$ ,  $R_{ct}$  and Warburg impedance values after fitting the impedance graphs of ZFO, ZFO-F<sub>1</sub>, ZFO-F<sub>2</sub>, ZFO-F<sub>3</sub>.**

| materials          | ZFO      | ZFO-F <sub>1</sub> | ZFO-F <sub>2</sub> | ZFO-F <sub>3</sub> |
|--------------------|----------|--------------------|--------------------|--------------------|
| $R_s$              | 5.576    | 4.902              | 3.28               | 5.277              |
| $R_{ct}$ (ohm)     | 101.1    | 80.52              | 43.12              | 82.00              |
| $W(S \cdot sec^5)$ | 0.005689 | 0.005866           | 0.01096            | 0.005765           |

**Table S4. List of the initial coulombic efficiency and cycling performance of recent reported ZnFe<sub>2</sub>O<sub>4</sub> anode materials prepared by other methods.**

| Materials                                                                                                     | Preparation methods                           | Initial coulombic efficiency(%) | Cycling performance                                                  | Ref. |
|---------------------------------------------------------------------------------------------------------------|-----------------------------------------------|---------------------------------|----------------------------------------------------------------------|------|
| ZnFe <sub>2</sub> O <sub>4</sub> –Carbonaceous composites                                                     | Electrophoretic deposition                    | 68.0                            | 870 mAh·g <sup>-1</sup> after 100 cycles at 0.5 A·g <sup>-1</sup>    | 1    |
| Fabrication of ultrafine ZnFe <sub>2</sub> O <sub>4</sub> nanoparticles                                       | Electrospinning technology and hydrothermal   | 71.7                            | 789.7 mAh·g <sup>-1</sup> after 300 cycles at 0.2 A·g <sup>-1</sup>  | 2    |
| multi-scaled ZnFe <sub>2</sub> O <sub>4</sub> microspheres                                                    | Self-template fabrication                     | 70.6                            | 681 mAh·g <sup>-1</sup> after 200 cycles at 0.5 A·g <sup>-1</sup>    | 3    |
| Sulfur-doped ZnFe <sub>2</sub> O <sub>4</sub> nanoparticles                                                   | Hydrothermal method                           | 97.3                            | 604 mAh·g <sup>-1</sup> after 60 cycles at 0.1 A·g <sup>-1</sup>     | 4    |
| ZnO/ZnFe <sub>2</sub> O <sub>4</sub> /N-doped C micro-polyhedrons with hierarchical hollow structure          | Self-template method                          | 67.4                            | 1000 mAh·g <sup>-1</sup> after 100 cycles at 0.2 A·g <sup>-1</sup>   | 5    |
| MOF derived ZnFe <sub>2</sub> O <sub>4</sub> nanoparticles                                                    | Scattered in hollow octahedra carbon skeleton | 62.3                            | 1780mAh·g <sup>-1</sup> after 400 cycles at 0.2 A·g <sup>-1</sup>    | 6    |
| $\alpha$ -Fe <sub>2</sub> O <sub>3</sub> nanoparticles into ZnFe <sub>2</sub> O <sub>4</sub>                  | In-situ encapsulation micro-sized capsules    | 68                              | 650mAh·g <sup>-1</sup> after 500 cycles at 0.2 A·g <sup>-1</sup>     | 7    |
| Nitrogen and sulfur co-doped graphene supported hollow ZnFe <sub>2</sub> O <sub>4</sub> nanosphere composites | Two-step hydrothermal method                  | 64                              | 729.06 mAh·g <sup>-1</sup> after 100 cycles at 0.3 A·g <sup>-1</sup> | 8    |
| hollow ZnFe <sub>2</sub> O <sub>4</sub> nanospheres                                                           | solvothermal method                           | 73.9                            | 1101.3 mAh·g <sup>-1</sup> after 200 cycles at 0.2 A·g <sup>-1</sup> | 9    |

|                                                    |                               |    |                                                                   |           |
|----------------------------------------------------|-------------------------------|----|-------------------------------------------------------------------|-----------|
| F-doped ZnFe <sub>2</sub> O <sub>4</sub> particles | Solvent heating and quenching | 72 | 968 mAh·g <sup>-1</sup> after 200 cycles at 0.5 A·g <sup>-1</sup> | This work |
|----------------------------------------------------|-------------------------------|----|-------------------------------------------------------------------|-----------|

---

#### References

1. S. Das, D. Das, A. Mitra, S. Jena, A. Bhattacharya and S. B. Majumder, *Materials Letters*, 2021, **301**.
2. Y. He, S. Yao, M. Bi, H. Yu, A. Majeed and X. Shen, *Electrochimica Acta*, 2021, **394**.
3. C. Chen, J. C. Huang and J. G. Duh, *Journal of Alloys and Compounds*, 2021, **862**.
4. L. Nie, H. Wang, J. Ma, S. Liu and R. Yuan, *Journal of Materials Science*, 2016, **52**, 3566-3575.
5. Y. Ma, Y. Ma, D. Geiger, U. Kaiser, H. Zhang, G.-T. Kim, T. Diemant, R. J. Behm, A. Varzi and S. Passerini, *Nano Energy*, 2017, **42**, 341-352.
6. C. Mei, S. Hou, M. Liu, Y. Guo, T. Liu, J. Li, W. Fu, L. Wang and L. Zhao, *Applied Surface Science*, 2021, **541**, 148475.
7. W. Wu, Y. Wei, H. Chen, K. Wei, Z. Li, J. He, L. Deng, L. Yao and H. Yang, *Journal of Materials Science & Technology*, 2021, **75**, 110-117.
8. M. Wang, Y. Huang, X. Chen, K. Wang, H. Wu, N. Zhang and H. Fu, *Journal of Alloys and Compounds*, 2017, **691**, 407-415.
9. M. Yu, Y. Huang, K. Wang, X. Han, M. Wang, Y. Zhu and L. Liu, *Applied Surface Science*, 2018, **462**, 955-962.
